# Supplementary material
Source: HighWire-hosted journal article supplement (http://www.cmaj.ca/highwire/filestream/58719/field_highwire_adjunct_files/7/insulin-yu-8-at.pdf)
Supplement: insulin-yu-8-at.pdf [file insulin-yu-8-at.pdf]

## Appendix 8: Impact of different regimens for insulin initiation on vascular outcomes, lipid profile and quality of life

*Vascular outcomes:* We found no randomized controlled trials that compared the relative efficacy of contemporary insulin initiation regimens in the prevention of cardiovascular disease. However, one retrospective cohort study compared incidence rates of heart failure, stroke and acute myocardial infarction among patients taking different types of insulin.<sup>1</sup> There was a reduced incidence of acute myocardial infarction in the glargine group (incidence rate ratio = 0.81, 95% confidence interval 0.65 to 1.21); however, this difference disappeared after adjustment for duration of diabetes. There was also a reduced incidence of stroke in the glargine group, although the clinical significance of this finding is uncertain owing to limitations of observational studies.

*Lipid profile:* A small randomized trial showed that insulin therapy reduced serum triglyceride levels compared with metformin and sulfonylurea combination therapy (-0.55 mmol/L v. +0.84 mmol/L,  $p < 0.05$ ) independent of glycemic control.<sup>2</sup> However, there appears to be no difference in efficacy of different insulin regimens.<sup>3,4</sup>

*Quality of life:* We identified only one trial comparing treatment satisfaction with different insulin initiation regimens.<sup>4</sup> This small trial showed that satisfaction was greater with intermediate-acting insulin twice daily than with short-acting insulin three times daily, because of convenience.

### References

1. Juhaeri J, Gao S, Dai WS. Incidence rates of heart failure, stroke, and acute myocardial infarction among Type 2 diabetic patients using insulin glargine and other insulin. *Pharmacoepidemiol Drug Saf* 2009;18(6):497-503.
2. Rodier M, Colette C, Gouzes C, Michel F, Crastes de PA, Monnier L. Effects of insulin therapy upon plasma lipid fatty acids and platelet aggregation in NIDDM with secondary failure to oral antidiabetic agents. *Diabetes Res Clin Pract* 1995;28(1):19-28.
3. Lindstrom T, Arnqvist HJ, Olsson AG. Effect of different insulin regimens on plasma lipoprotein and apolipoprotein concentrations in patients with non-insulin-dependent diabetes mellitus. *Atherosclerosis* 1990;81(2):137-44.
4. Taylor R, Foster B, Kyne-Grzebalski D, Vanderpump M. Insulin regimens for the non-insulin dependent: impact on diurnal metabolic state and quality of life. *Diabet Med* 1994;11(6):551-7.
